# Supplementary material for: Plasmodium vivax transcriptomes reveal stage-specific chloroquine response and differential regulation of male and female gametocytes
Source: PubMed Central journal article supplement (PMC6342968; doi:10.1038/s41467-019-08312-z), 2019-01-22
Supplement: 41467_2019_8312_MOESM3_ESM.pdf [file 41467_2019_8312_MOESM3_ESM.pdf]

## **Description of Additional Supplementary Files**

File Name: Supplementary Data 1

Description: Sequencing and alignment statistics of each infection

File Name: Supplementary Data 2

Description: List of *P. vivax* genes whose expression levels are correlated with the expression of known gametocyte genes.

File Name: Supplementary Data 3

Description: Genes differentially expressed after chloroquine treatment (FDR<0.1).

File Name: Supplementary Data 4

Description: Gene expression signatures of the different developmental stages obtained by gene expression deconvolution.
